# Supplementary material for: Diversity and evolution of an abundant ICEclc family of integrative and conjugative elements in Pseudomonas aeruginosa
Source: PubMed Central journal article supplement (PMC10732049; doi:10.1128/msphere.00517-23), 2023-10-30

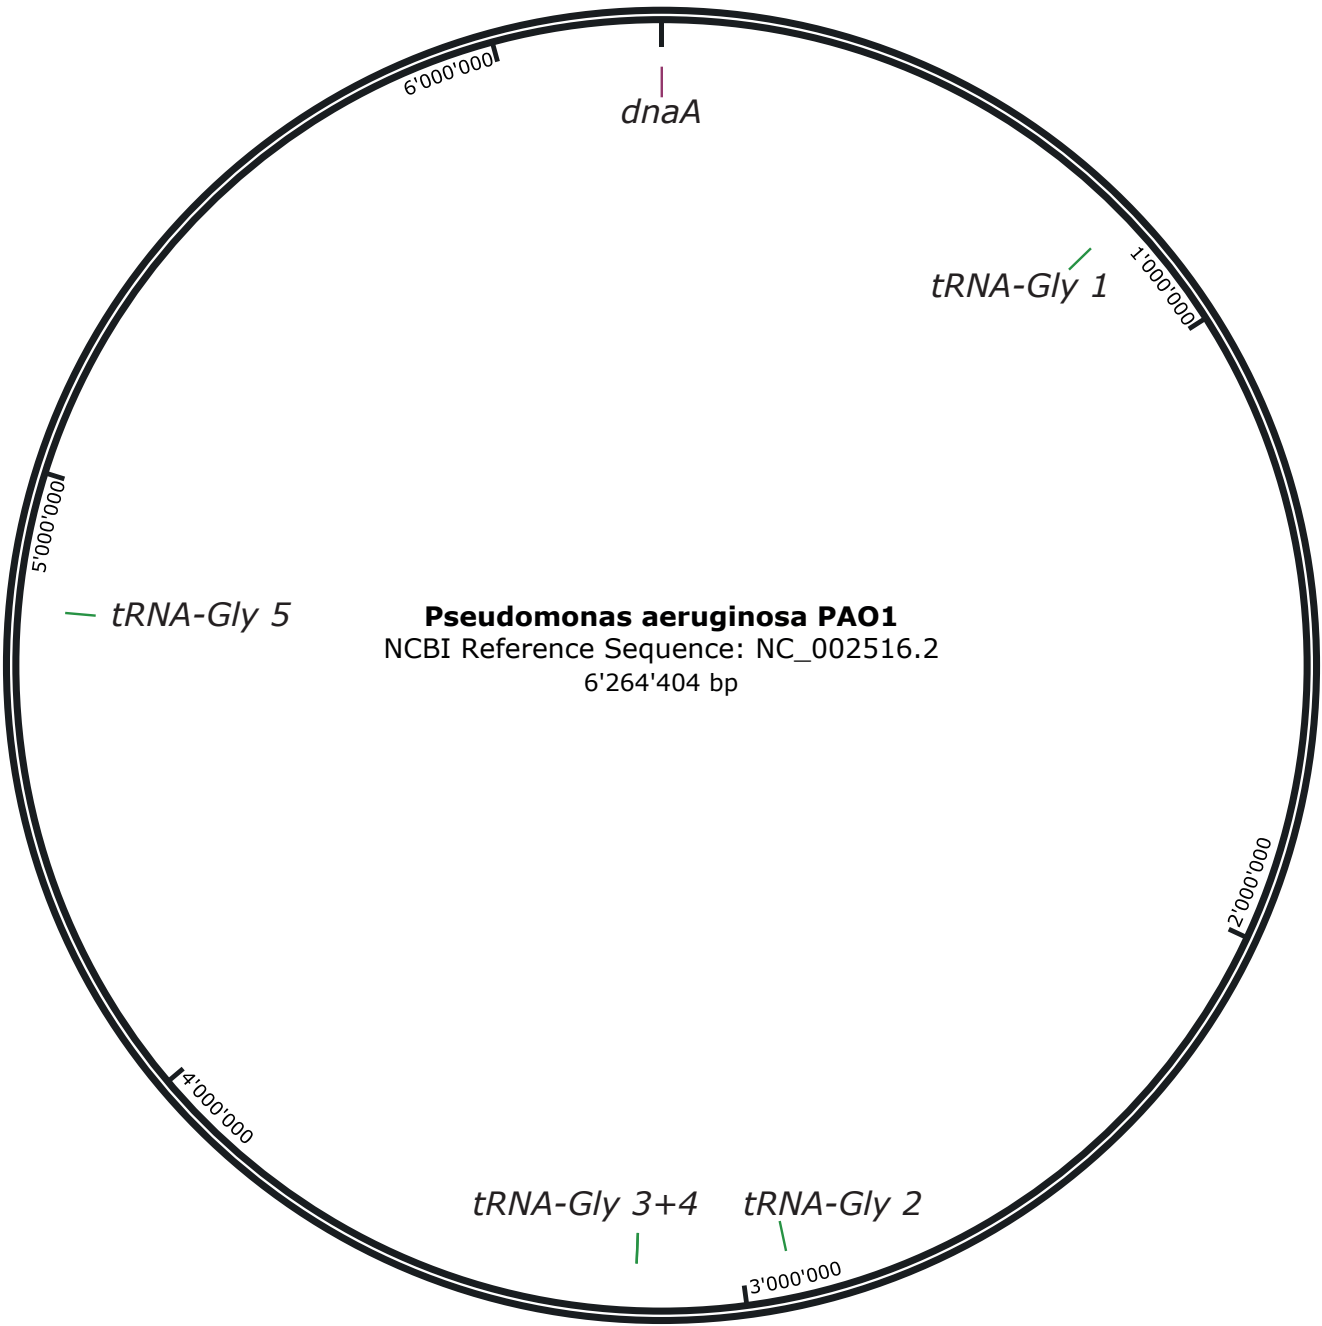

Supplement: msphere.00517-23-s0001.pdf [file msphere.00517-23-s0001.pdf]
